# Supplementary material for: One-step preparation of PEG segment-functionalized polystyrene microspheres and their application as latex in LOCI
Source: Royal Society of Chemistry journal article supplement (doi:10.1039/d2nj05630e), 2023-01-01
Supplement: d2nj05630e1.pdf [file d2nj05630e1.pdf]

**One-step preparation of PEG segment functionalized polystyrene microspheres  
and their application as latex in LOCI**

*Xiaoxiao Xing*<sup>a,1</sup>, *Qingyu Lv*<sup>b,1</sup>, *Chunyu Sun*<sup>a</sup>, *Jia Song*<sup>a</sup>, *Zhixin Chen*<sup>a</sup>, *Yong Jiang*<sup>a</sup>, *Ye Wang*<sup>b</sup>, *Yongqiang Jiang*<sup>b,\*</sup>, *Zhifei Wang*<sup>a,\*</sup>

<sup>a</sup> School of Chemistry and Chemical Engineering, Southeast University, Nanjing 211189, P. R. China

<sup>b</sup> State Key Laboratory of Pathogen and Biosecurity, Institute of Microbiology and Epidemiology, Academy of Military Medical Sciences, Beijing 100071, P. R. China

\* Corresponding authors:

Dr. Zhifei Wang, E-mail address: [zfwang@seu.edu.cn](mailto:zfwang@seu.edu.cn)

Dr. Yongqiang Jiang, E-mail address: [jiangyq@bmi.ac.cn](mailto:jiangyq@bmi.ac.cn)

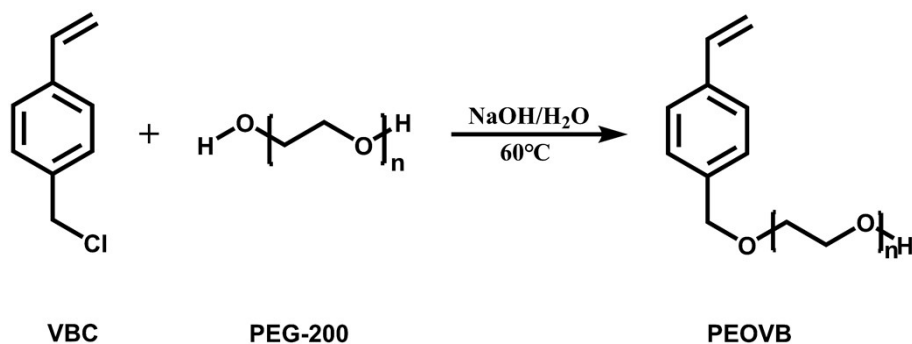

**Scheme S1.** Synthesis and characterization of PEOVB

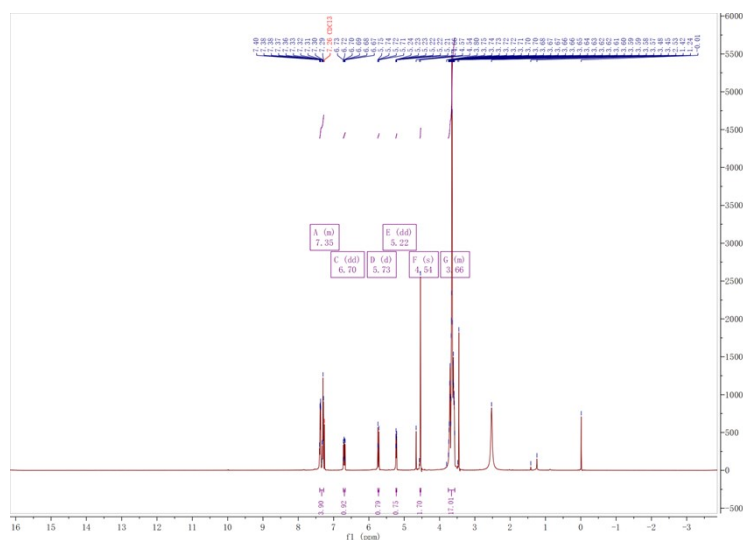

**Fig S1.**  $^1\text{H}$  NMR spectrum of PEOVB

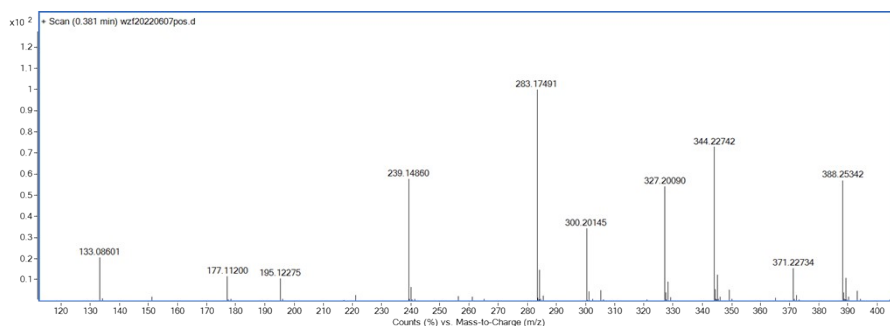

**Fig S2.** Mass spectrometry plot of PEG-200

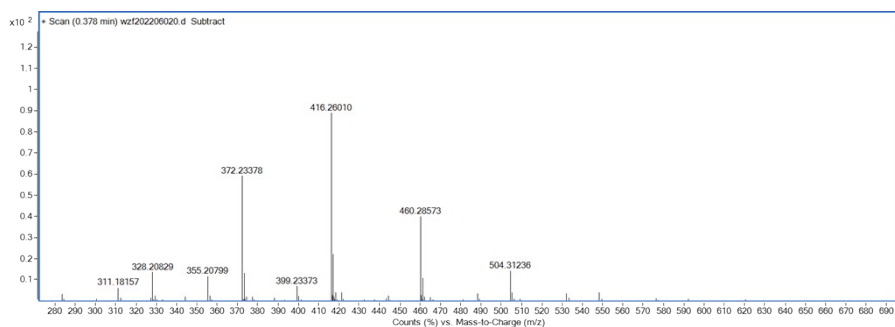

**Fig S3.** Mass spectrometry plot of PEOVB

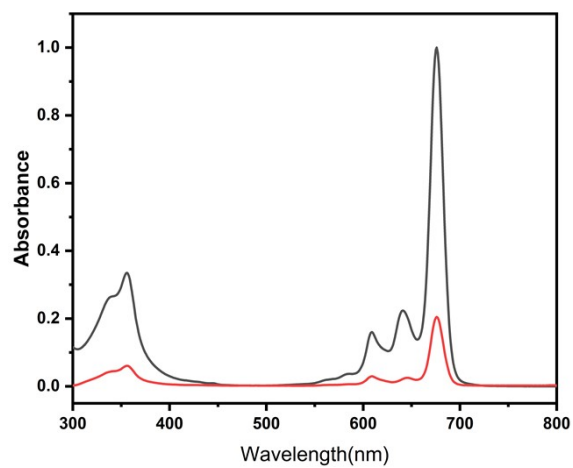

**Figure S4.** UV-vis absorption spectra of photosensitizers(black) and photosensitive polymer microspheres(red)

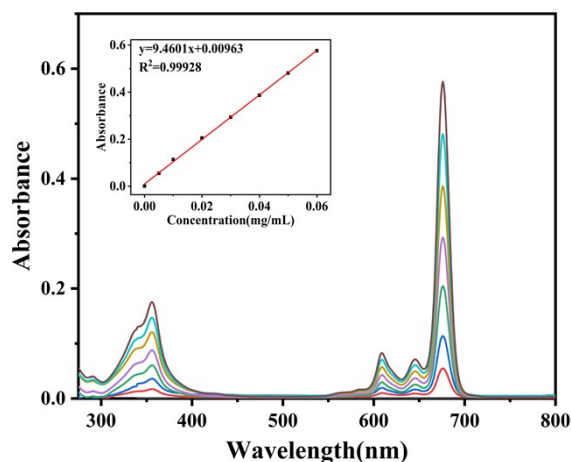

**Fig S5.** UV-vis absorption spectrum and standard curve of photosensitizers

**Photosensitive analysis of photosensitive polymer microspheres :** The 10 wt% photosensitive polymer microspheres (0.001 g) were dispersed in 10 mL of deionized water (0.1 mg/mL). Then 200  $\mu$ L of ABDA solution (4.80 mmol/L in dimethyl sulfoxide (DMSO)) was added to the above-mentioned portion of the solution and mixed to form a homogeneous solution, which was stabilized for 30 min under dark conditions, and the UV-vis spectra of the microsphere solutions were recorded using a laser at a wavelength of 680 nm as the excitation source.

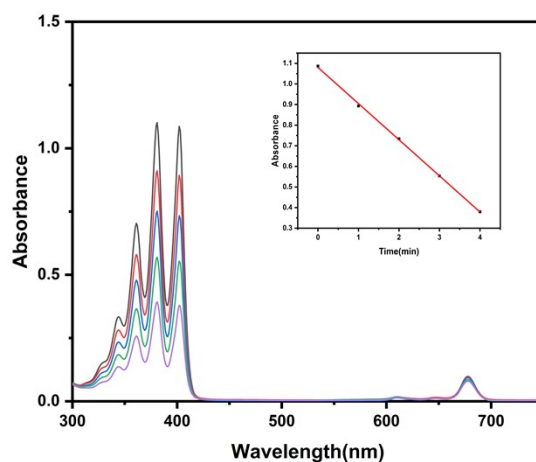

**Fig S6.** UV-vis spectra of ABDA in photosensitizers under illumination conditions (DMSO).

**Table S1** Test results of different content of RT (3 times).

| RT (ng/mL) | Average  | SD      | CV (%) |
|------------|----------|---------|--------|
| 0.1        | 5327.5   | 201.65  | 3.79   |
| 0.2        | 7268.0   | 664.13  | 9.14   |
| 0.39       | 8531.5   | 149.37  | 1.75   |
| 0.78       | 14568.5  | 868.79  | 5.96   |
| 1.56       | 21826.5  | 80.53   | 0.37   |
| 3.12       | 36802.5  | 724.98  | 1.97   |
| 6.25       | 60412.5  | 2635.74 | 4.36   |
| 12.5       | 95886.5  | 4034.70 | 4.21   |
| 25         | 128942.0 | 2851.26 | 2.21   |
| 50         | 162940.5 | 5674.69 | 3.48   |
| 100        | 190344.0 | 7051.88 | 3.70   |
